# Supplementary material for: Tuneable cellular-structured 3D graphene aerogel and its effect on electromagnetic interference shielding performance and mechanical properties of epoxy composites
Source: Royal Society of Chemistry journal article supplement (doi:10.1039/c6ra09459g), 2016-01-01
Supplement: c6ra09459g1.pdf [file c6ra09459g1.pdf]

## Electronic Supplementary Information

### **Tuneable cellular-structured 3D graphene aerogel and its effect on electromagnetic interference shielding performance and mechanical properties of epoxy composites**

*Yan-Jun Wan,<sup>a, b</sup> Shu-Hui Yu,<sup>b</sup> Wen-Hu Yang,<sup>b</sup> Peng-Li Zhu,<sup>b</sup> Rong Sun,<sup>b\*</sup> Ching-Ping Wong<sup>c</sup>, Wei-Hsin Liao<sup>a\*</sup>*

*a, Department of Mechanical and Automation Engineering, The Chinese University of Hong Kong, Shatin, NT, Hong Kong, China*

*b, Center for Advanced Materials, Shenzhen Institutes of Advanced Technology, Chinese Academy of Sciences, Shenzhen, China*

*c, Department of Electronic Engineering, The Chinese University of Hong Kong, Shatin, NT, Hong Kong, China.*

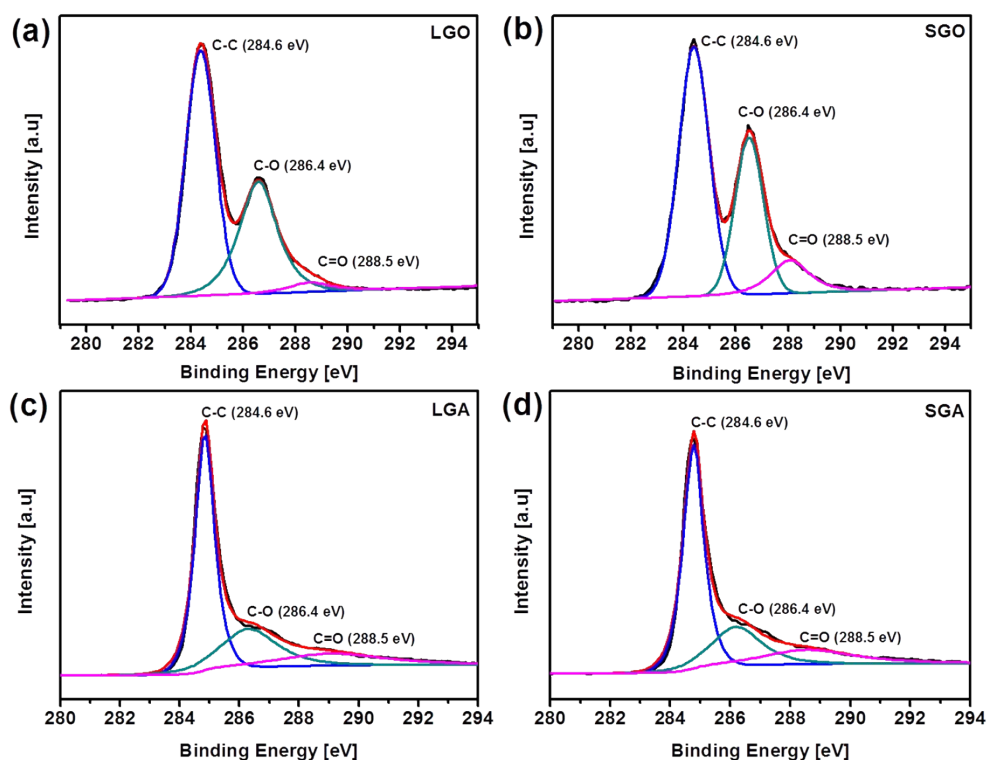

**Figure S1.** XPS C1s spectra of (a) LGO, (b) SGO, (c) LGA and (d) SGA

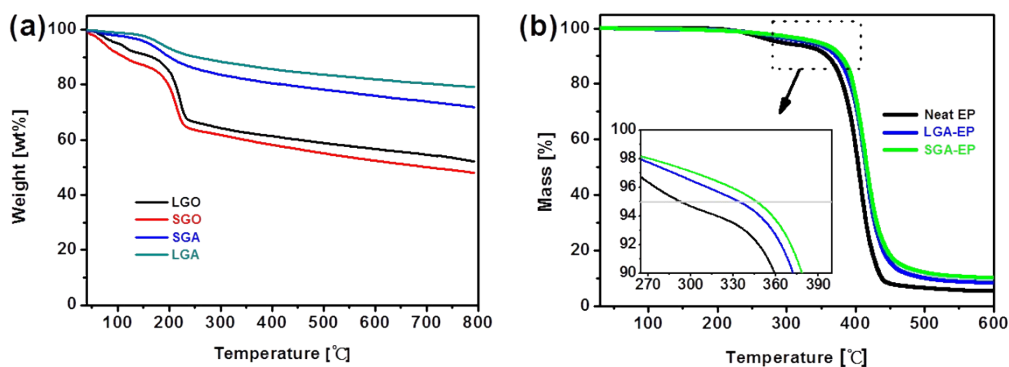

**Figure S2.** TGA curves of (a) various fillers and (b) neat epoxy and its composites filled with LGA and SGA.

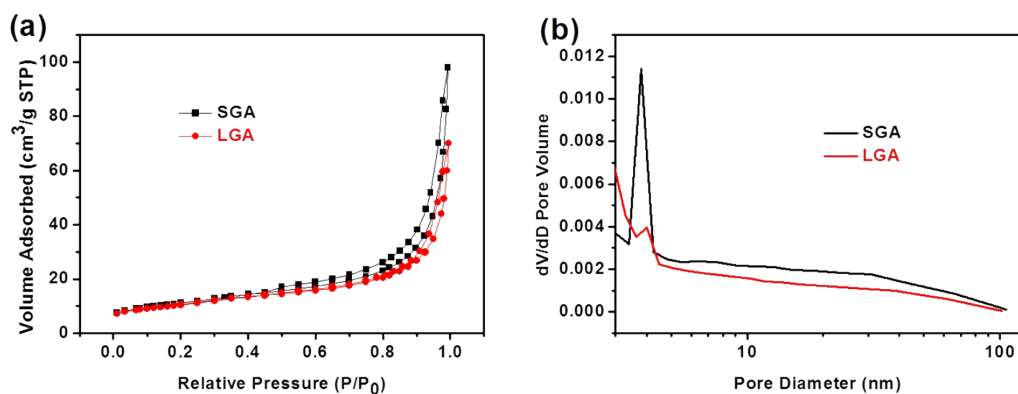

**Figure S3.** (a) N<sub>2</sub> adsorption-desorption isotherms of LGA and SGA with 37.0 and 39.8 m<sup>2</sup> g<sup>-1</sup> of specific surface areas calculated respectively by the BET method, and (b) pore size distribution of graphene aerogel with different sheet size.

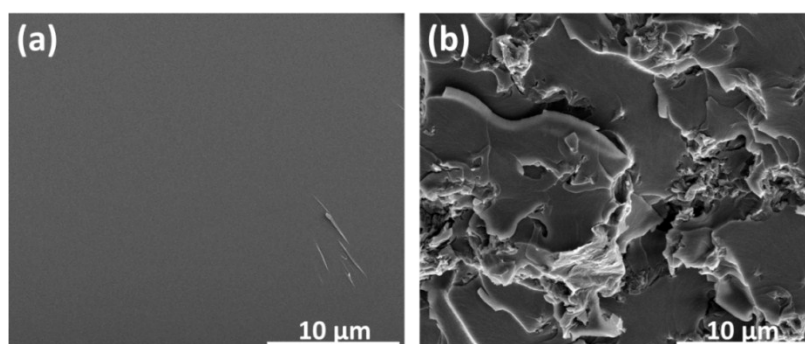

**Figure S4.** SEM images of fracture surface: (a) neat epoxy and (b) 1.0 wt% RGO-EP

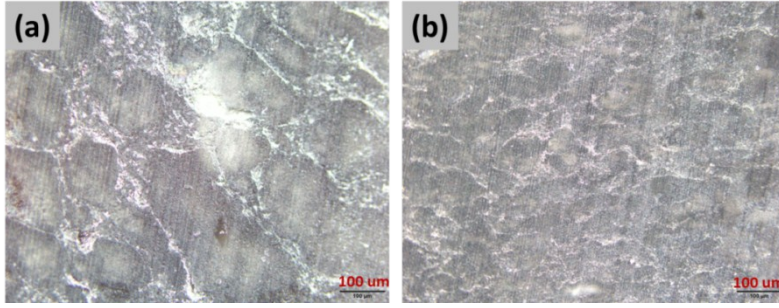

**Figure S5.** Transmission optical microscopy (TOM) images of epoxy composites filled with (a) LGA and (b) SGA.

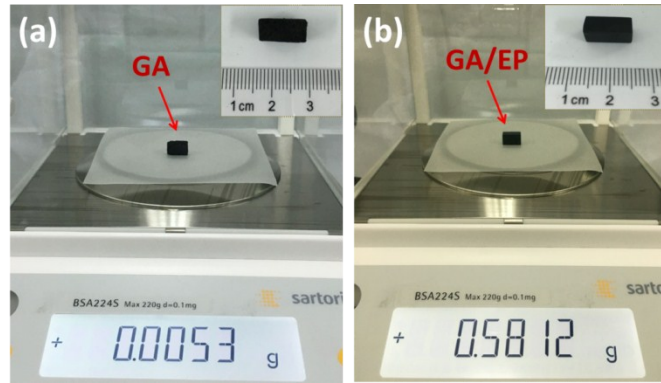

**Figure S6.** Comparison of mass of GA and GA-EP with the same shape and size

$$\text{Weight percent of GA in composites} = \frac{m_{GA}}{m_{Composites}} * 100\% = \frac{0.0053 \text{ g}}{0.5812 \text{ g}} * 100\% \approx 1.0\%$$

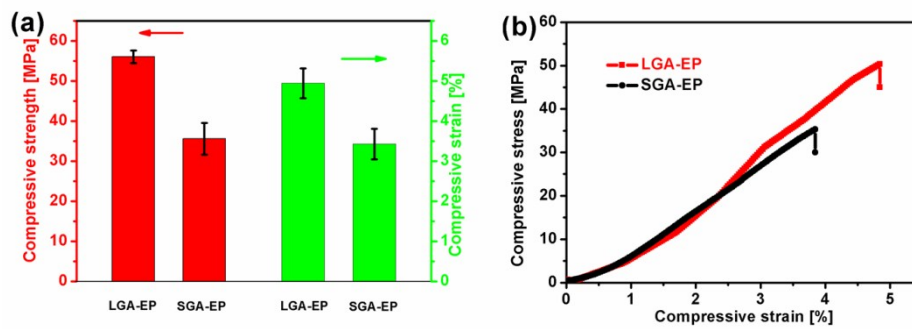

**Figure S7.** (a) Compressive strength and compressive strain and (b) typical compressive stress-strain

curves.

**Table S1 EMI shielding performance of typical Carbon-based polymer composites at 10 GHz**

| Polymer composites                                    | Filler contents (wt %) | Thickness (mm) | EMI shielding performance (dB) | Reference               |
|-------------------------------------------------------|------------------------|----------------|--------------------------------|-------------------------|
| PEI/graphene foam                                     | 10.0                   | 2.3            | ~ 10                           | [1]                     |
| Graphene/epoxy                                        | 15.0                   | -              | ~ 20                           | [2]                     |
| Graphene/PMMA foam                                    | 1.2                    | 4.0            | ~ 4                            | [3]                     |
| Porous graphene/PS                                    | 30.0                   | 2.5            | ~ 16                           | [4]                     |
| Functionalized graphene/PS                            | 7.7                    | 3.0            | ~ 32                           | [5]                     |
| Graphene/paraffin wax                                 | 20.0                   | 2.0            | ~ 21                           | [6]                     |
| Fe <sub>3</sub> O <sub>4</sub> decorated graphene/PVC | 10.0                   | 1.8            | ~ 10                           | [7]                     |
| CVD graphene aerogel /PDMS foam                       | 0.8                    | 3.0            | ~ 20                           | [8]                     |
| Long SWCNTs/epxoy                                     | 15.0                   | 2.0            | ~ 24                           | [9]                     |
| Graphene aerogel/epoxy (with large graphene sheets)   | ~1.0                   | 3.0            | up to 30                       | <b><i>This work</i></b> |

## References

- [1] J. Ling, W. Zhai, W. Feng, B. Shen, J. Zhang and W. g. Zheng, *ACS Appl. Mater. Interfaces*, 2013, **5**, 2677-2684.
- [2] J. Liang, Y. Wang, Y. Huang, Y. Ma, Z. Liu, J. Cai, C. Zhang, H. Gao and Y. Chen, *Carbon*,

2009, **47**, 922-925.

[3] H.-B. Zhang, Q. Yan, W.-G. Zheng, Z. He and Z.-Z. Yu, *ACS Appl. Mater. Interfaces*, 2011, **3**, 918-924.

[4] D.-X. Yan, P.-G. Ren, H. Pang, Q. Fu, M.-B. Yang and Z.-M. Li, *J. Mater. Chem.*, 2012, **22**, 18772-18774.

[5] S.-T. Hsiao, C.-C. M. Ma, H.-W. Tien, W.-H. Liao, Y.-S. Wang, S.-M. Li and Y.-C. Huang, *Carbon*, 2013, **60**, 57-66.

[6] B. Wen, X. Wang, W. Cao, H. Shi, M. Lu, G. Wang, H. Jin, W. Wang, J. Yuan and M. Cao, *Nanoscale*, 2014, **6**, 5754-5761.

[7] K. Yao, J. Gong, N. Tian, Y. Lin, X. Wen, Z. Jiang, H. Na and T. Tang, *RSC Adv.*, 2015, **5**, 31910-31919.

[8] Z. Chen, C. Xu, C. Ma, W. Ren and H. M. Cheng, *Adv. Mater.*, 2013, **25**, 1296-1300.

[9] Y. Huang, N. Li, Y. Ma, F. Du, F. Li, X. He, X. Lin, H. Gao and Y. Chen, *Carbon*, 2007, **45**, 1614-1621.
